# Supplementary material for: Light-Dependent Expression and Promoter Methylation of the Genes Encoding Succinate Dehydrogenase, Fumarase, and NAD-Malate Dehydrogenase in Maize (Zea mays L.) Leaves
Source: MDPI journal article supplement (doi:10.3390/ijms241210211), 2023-06-16
Supplement: s1 [file s1]

Supplementary Table S1. Oligonucleotides for methyl-specific PCR for the promoters of the succinate dehydrogenase genes *Sdh1-2*, *Sdh2-3*, *Sdh3-1*, *Sdh4*

| Gene          |     | Distance | M or U    | 5'-oligonucleotide-3'       |
|---------------|-----|----------|-----------|-----------------------------|
| <i>Sdh1-2</i> | I   | -57      | forward M | AATATATTTTAAATTGCA          |
|               |     |          | reverse M | TAATTTAAGGTTAGAGG           |
|               |     |          | forward U | AATATATTTTAAATTACA          |
|               |     |          | reverse U | TAATTTAAGGTTAGAGG           |
|               | II  | -115     | forward M | TAACCCACCTTACAAGCA          |
|               |     |          | reverse M | TAATTTAAGGTTAGAGG           |
|               |     |          | forward U | TAACCCACCTTACAAACA          |
|               |     |          | reverse U | TAATTTAAGGTTAGAGG           |
|               | III | -307     | forward M | CAAATAAAACTATTGCT           |
|               |     |          | reverse M | TAATTTAAGGTTAGAGG           |
|               |     |          | forward U | CAAATAAAACTATTACT           |
|               |     |          | reverse U | TAATTTAAGGTTAGAGG           |
| <i>Sdh2-3</i> | I   | -109     | forward M | TTTATACGATCGAGTTAGTACG      |
|               |     |          | reverse M | AAAATATCTTTAAATAAATCTTAAACC |
|               |     |          | forward U | TTTTTTATATGATTGAGTTAGTATG   |
|               |     |          | reverse U | AAAATATCTTTAAATAAATCTTAAACC |
|               | II  | -165     | forward M | TTAATAATATCAACAAGCG         |
|               |     |          | reverse M | TTAGTTATAAATTTTGATTG        |
|               |     |          | forward U | TTAATAATATCAACAAACG         |
|               |     |          | reverse U | TTAGTTATAAATTTTGATTG        |
|               | III | -205     | forward M | AAATCTTCTTTCACCCGCT         |
|               |     |          | reverse M | TTAGTTATAAATTTTGATTG        |
|               |     |          | forward U | AAATCTTCTTTCACCCACT         |
|               |     |          | reverse U | TTAGTTATAAATTTTGATTG        |
| <i>Sdh3-1</i> | I   | -506     | forward M | TATTTTATGTTTTTATTTTGCGG     |
|               |     |          | reverse M | TCAAGGGAACGAGTATATCTAAAC    |
|               |     |          | forward U | TATTTTATGTTTTTATTTGTGG      |
|               |     |          | reverse U | TTAAGGGAATGAGTATATTAAAT     |
|               | II  | -454     | forward M | TATAATAAGGGTAAGTGAAAGTCGT   |
|               |     |          | reverse M | TCAAGGGAACGAGTATATCTAAAC    |
|               |     |          | forward U | TATAATAAGGGTAAGTGAAAGTTGT   |
|               |     |          | reverse U | TTAAGGGAATGAGTATATTAAAT     |
|               | III | -431     | forward M | TTTAGAGGGGAGGTGAATAGGCGA    |
|               |     |          | reverse M | TCAAGGGAACGAGTATATCTAAAC    |
|               |     |          | forward U | TTTAGAGGGGAGGTGAATAGGTGA    |

|             |     |      |           |                           |
|-------------|-----|------|-----------|---------------------------|
|             |     |      | reverse U | TTAAGGGAATGAGTATATTTAAAT  |
| <i>Sdh4</i> | I   | -57  | forward M | GATGTTTTTTCGTCGTATTATTTTC |
|             |     |      | reverse M | GTATTAGGCGGTTTTAGAGAAGG   |
|             |     |      | forward U | TGTTTTTTTGTTGTATTATTTTGA  |
|             |     |      | reverseU  | GTATTAGGCGGTTTTAGAGAAGG   |
|             | II  | -115 | forward M | TTTTAAAGTTTTTATTTTTTTTCGA |
|             |     |      | reverse M | GTATTAGGCGGTTTTAGAGAAGG   |
|             |     |      | forward U | TTTTAAAGTTTTTATTTTTTTTGA  |
|             |     |      | reverse U | GTATTAGGCGGTTTTAGAGAAGG   |
|             | III | -307 | forward M | AAATTAGATTTAATTAATTCGT    |
|             |     |      | reverse M | GTATTAGGCGGTTTTAGAGAAGG   |
|             |     |      | forward U | AAATTAGATTTAATTAATTTTGT   |
|             |     |      | reverse U | GTATTAGGCGGTTTTAGAGAAGG   |

Supplementary Table S2. Oligonucleotides for methyl-specific PCR for the promoters of the fumarase gene *Fum1*

| Gene        |     | Distance | M or U    | 5'-oligonucleotide-3'     |
|-------------|-----|----------|-----------|---------------------------|
| <i>Fum1</i> | I   | -495     | forward M | GGGTGGATTTATATAGAGTGGGTC  |
|             |     |          | reverse M | ACGAATACCTCATACGAAATAACG  |
|             |     |          | forward U | GGTGGATTTATATAGAGTGGGTTG  |
|             |     |          | reverse U | CAAATACCTCATACAAAATAACAAA |
|             | II  | -524     | forward M | AGGGGTATTACGTGTGGGTTTCG   |
|             |     |          | reverse M | ACGAATACCTCATACGAAATAACG  |
|             |     |          | forward U | AGGGGTATTACGTGTGGGTTTG    |
|             |     |          | reverse U | CAAATACCTCATACAAAATAACAAA |
|             | III | -557     | forward M | TATTTATGTATAAAATTTCG      |
|             |     |          | reverse M | ACGAATACCTCATACGAAATAACG  |
|             |     |          | forward U | TATTTATGTATAAAATTTGT      |
|             |     |          | reverse U | CAAATACCTCATACAAAATAACAAA |

Supplementary Table S3. Oligonucleotides for methyl-specific PCR for the promoters of the NAD-malate dehydrogenase genes *mMdh1* and *mMdh2*

| Gene         |     | Distance | M or U    | 5'-oligonucleotide-3'        |
|--------------|-----|----------|-----------|------------------------------|
| <i>mMdh1</i> | I   | -365     | forward M | CTCCTATAACTATTATCAATATAAAGCA |
|              |     |          | reverse M | GATTATTGGTTGAGTAGGAGG        |
|              |     |          | forward U | CTCCTATAACTATTATCAATATAAAACA |
|              |     |          | reverse U | ATTATTGGTTGAGTAGGAGG         |
|              | II  | -245     | forward M | AAATCTAAATAAACAATCGCC        |
|              |     |          | reverse M | GATTATTGGTTGAGTAGGAGG        |
|              |     |          | forward U | CATAAATCTAAATAAACAACA        |
|              |     |          | reverse U | ATTATTGGTTGAGTAGGAGG         |
|              | III | -194     | forward M | CCGCTAAAAAATAATAGCA          |
|              |     |          | reverse M | GATTATTGGTTGAGTAGGAGG        |
|              |     |          | forward U | CCGCTAAAAAATAATAACA          |
|              |     |          | reverse U | ATTATTGGTTGAGTAGGAGG         |
| <i>mMdh2</i> | I   | -634     | forward M | GTTTGTGTTGTTGTTGTTATTGTC     |
|              |     |          | reverse M | TTCCTAACTCCCCTAAAACTCGT      |
|              |     |          | forward U | TTGTTTGTGTTGTTGTTATTGTTGT    |
|              |     |          | reverse U | TTTTCCTAACTCCCCTAAAACTCAT    |
|              | II  | -704     | forward M | TGTTTTGTATTTTTTATTATCGA      |
|              |     |          | reverse M | TTCCTAACTCCCCTAAAACTCGT      |
|              |     |          | forward U | TGTTTTGTATTTTTTATTATTGA      |
|              |     |          | reverse U | TTTTCCTAACTCCCCTAAAACTCAT    |
|              | III | -803     | forward M | TTTTTTCGTTGTTTTTTAGGTCGT     |
|              |     |          | reverse M | TTCCTAACTCCCCTAAAACTCGT      |
|              |     |          | forward U | TTTTTTCGTTGTTTTTTAGGTTGT     |
|              |     |          | reverse U | TTTTCCTAACTCCCCTAAAACTCAT    |

Note: The minus sign indicates at what distance from the beginning of the first exon of the gene the studied cytosine is located; I, II, III - different groups of primers. Cytosine in each group of primers differed by the presence of methylation (M) or its absence (U).
